# Supplementary material
Source: PubMed Central journal article supplement (PMC7041587)
Supplement: JCM.01897-19-s0001.pdf [file JCM.01897-19-s0001.pdf]

**Supplementary Table 1.** Results for 181 samples across all assays used in the study.

| Clinical sample/<br>dilution series | Sample no. | Gender (M/F) | Year of collection | Specimen type (additional water added, where required) | In-house-MgPa-PCR | RPMG                                      |           |            |      | MG-Flex                                   |           |            |      |
|-------------------------------------|------------|--------------|--------------------|--------------------------------------------------------|-------------------|-------------------------------------------|-----------|------------|------|-------------------------------------------|-----------|------------|------|
|                                     |            |              |                    |                                                        |                   | RPMG assay - Interpretation               | Ct values |            |      | MG-Flex assay - Interpretation            | Ct values |            |      |
|                                     |            |              |                    |                                                        |                   |                                           | MgPa      | 23S rRNA ‡ | IC   |                                           | MgPa      | 23S rRNA ‡ | IC   |
| clinical sample                     | 1          | F            | 2018               | Cervical Swab                                          | DETECTED          | Mg DETECTED. 23S rRNA mutations DETECTED. | 29.1      | 30.4       | 23.1 | Mg DETECTED. 23S rRNA mutations DETECTED. | 28.3      | 29.3       | 19   |
| clinical sample                     | 2          | F            | 2018               | Cervical Swab                                          | DETECTED          | Mg DETECTED. 23S rRNA mutations DETECTED. | 35.1      | 36.2       | 24.4 | Mg DETECTED. 23S rRNA mutations DETECTED. | 34.4      | 38.3       | 19.2 |
| clinical sample                     | 3          | F            | 2018               | Cervical Swab                                          | DETECTED          | Mg DETECTED. 23S rRNA mutations DETECTED. | 18.3      | 22.4       | 23.4 | Mg DETECTED. 23S rRNA mutations DETECTED. | 17.4      | 22.3       | 16.7 |
| clinical sample                     | 4          | F            | 2018               | Urine                                                  | DETECTED          | Mg DETECTED. 23S rRNA mutations DETECTED. | 21.3      | 23.8       | 22.7 | Mg DETECTED. 23S rRNA mutations DETECTED. | 21.9      | 22.5       | 23.3 |
| clinical sample                     | 5          | F            | 2017               | Urine                                                  | DETECTED          | Mg DETECTED. 23S rRNA mutations DETECTED. | 25.8      | 26.1       | 22.8 | Mg DETECTED. 23S rRNA mutations DETECTED. | 24.1      | 24.5       | 22.4 |
| clinical sample                     | 6          | F            | 2018               | Vaginal Swab                                           | DETECTED          | Mg DETECTED. 23S rRNA mutations DETECTED. | 27.3      | 29.2       | 22.3 | Mg DETECTED. 23S rRNA mutations DETECTED. | 25.1      | 24.8       | 19.5 |
| clinical sample                     | 7          | M            | 2018               | Rectal Swab (500 µL)                                   | DETECTED          | Mg DETECTED. 23S rRNA mutations DETECTED. | 28.1      | 29.3       | 23.7 | Mg DETECTED. 23S rRNA mutations DETECTED. | 27.1      | 26.2       | 18.1 |
| clinical sample                     | 8          | M            | 2018               | Rectal Swab (600 µL)                                   | DETECTED          | Mg DETECTED. 23S rRNA mutations DETECTED. | 23.4      | 25.3       | 22.6 | Mg DETECTED. 23S rRNA mutations DETECTED. | 21.4      | 26.4       | 18.3 |
| clinical sample                     | 9          | M            | 2018               | Rectal Swab (800 µL)                                   | DETECTED          | Mg DETECTED. 23S rRNA mutations DETECTED. | 34.6      | 35.1       | 23.3 | Mg DETECTED. 23S rRNA mutations DETECTED. | 35.5      | 38.8       | 19.7 |
| clinical sample                     | 10         | M            | 2018               | Urethral Swab                                          | DETECTED          | Mg DETECTED. 23S rRNA mutations DETECTED. | 24.2      | 27.1       | 22.2 | Mg DETECTED. 23S rRNA mutations DETECTED. | 20.4      | 21.3       | 22.9 |
| clinical sample                     | 11         | M            | 2018               | Urine                                                  | DETECTED          | Mg DETECTED. 23S rRNA mutations DETECTED. | 25.6      | 26.7       | 23.6 | Mg DETECTED. 23S rRNA mutations DETECTED. | 21.5      | 22         | 19.4 |
| clinical sample                     | 12         | M            | 2018               | Urine                                                  | DETECTED          | Mg DETECTED. 23S rRNA mutations DETECTED. | 30.4      | 31.3       | 22.9 | Mg DETECTED. 23S rRNA mutations DETECTED. | 28.6      | 28.6       | 19.8 |
| clinical sample                     | 13         | M            | 2017               | Urine                                                  | DETECTED          | Mg DETECTED. 23S rRNA mutations DETECTED. | 26.7      | 27.9       | 23.8 | Mg DETECTED. 23S rRNA mutations DETECTED. | 24.8      | 24.7       | 20.1 |
| clinical sample                     | 14         | M            | 2017               | Urine                                                  | DETECTED          | Mg DETECTED. 23S rRNA mutations DETECTED. | 25.3      | 26.9       | 24.1 | Mg DETECTED. 23S rRNA mutations DETECTED. | 24.9      | 25.1       | 17.9 |
| clinical sample                     | 15         | M            | 2017               | Urine                                                  | DETECTED          | Mg DETECTED. 23S rRNA mutations DETECTED. | 27.4      | 28.1       | 24.4 | Mg DETECTED. 23S rRNA mutations DETECTED. | 25.6      | 25.2       | 18.4 |
| clinical sample                     | 16         | M            | 2018               | Urine                                                  | DETECTED          | Mg DETECTED. 23S rRNA mutations DETECTED. | 21.3      | 22.9       | 24.3 | Mg DETECTED. 23S rRNA mutations DETECTED. | 20.6      | 21.3       | 19   |
| clinical sample                     | 17         | M            | 2018               | Urine                                                  | DETECTED          | Mg DETECTED. 23S rRNA mutations DETECTED. | 28.3      | 31.3       | 22.4 | Mg DETECTED. 23S rRNA mutations DETECTED. | 27.7      | 29.9       | 18.8 |
| clinical sample                     | 18         | M            | 2018               | Urine                                                  | DETECTED          | Mg DETECTED. 23S rRNA mutations DETECTED. | 23.8      | 24.3       | 24.3 | Mg DETECTED. 23S rRNA mutations DETECTED. | 23        | 23.1       | 18.3 |

|                 |      |   |      |               |          |                                           |      |      |      |                                           |      |      |      |
|-----------------|------|---|------|---------------|----------|-------------------------------------------|------|------|------|-------------------------------------------|------|------|------|
| clinical sample | 19   | M | 2018 | Urine         | DETECTED | Mg DETECTED. 23S rRNA mutations DETECTED. | 21.1 | 23.3 | 22.4 | Mg DETECTED. 23S rRNA mutations DETECTED. | 20.7 | 21.9 | 19.8 |
| clinical sample | 20   | M | 2018 | Urine         | DETECTED | Mg DETECTED. 23S rRNA mutations DETECTED. | 28.3 | 32.4 | 22.4 | Mg DETECTED. 23S rRNA mutations DETECTED. | 24.1 | 29   | 22.2 |
| clinical sample | 21   | M | 2017 | Urine         | DETECTED | Mg DETECTED. 23S rRNA mutations DETECTED. | 24.2 | 29.9 | 23.7 | Mg DETECTED. 23S rRNA mutations DETECTED. | 25   | 30.1 | 19.7 |
| clinical sample | 22   | M | 2017 | Urine         | DETECTED | Mg DETECTED. 23S rRNA mutations DETECTED. | 22.2 | 26.7 | 24.5 | Mg DETECTED. 23S rRNA mutations DETECTED. | 20.6 | 25.2 | 18.6 |
| clinical sample | 23   | M | 2017 | Urine         | DETECTED | Mg DETECTED. 23S rRNA mutations DETECTED. | 24.4 | 26.3 | 24.1 | Mg DETECTED. 23S rRNA mutations DETECTED. | 21.1 | 22.1 | 16.8 |
| clinical sample | 24   | M | 2018 | Urine         | DETECTED | Mg DETECTED. 23S rRNA mutations DETECTED. | 26.4 | 29.3 | 23.3 | Mg DETECTED. 23S rRNA mutations DETECTED. | 24.7 | 24.3 | 18.2 |
| clinical sample | 25   | M | 2018 | Urine         | DETECTED | Mg DETECTED. 23S rRNA mutations DETECTED. | 21.3 | 23.3 | 22.7 | Mg DETECTED. 23S rRNA mutations DETECTED. | 20.6 | 25.7 | 17.5 |
| clinical sample | 26   | M | 2018 | Urine         | DETECTED | Mg DETECTED. 23S rRNA mutations DETECTED. | 19.7 | 24.1 | 23.1 | Mg DETECTED. 23S rRNA mutations DETECTED. | 20.1 | 21.1 | 18.1 |
| clinical sample | 27   | M | 2018 | Urine         | DETECTED | Mg DETECTED. 23S rRNA mutations DETECTED. | 22.1 | 25.6 | 24.2 | Mg DETECTED. 23S rRNA mutations DETECTED. | 20.1 | 21.5 | 17.6 |
| clinical sample | 28   | M | 2018 | Urine         | DETECTED | Mg DETECTED. 23S rRNA mutations DETECTED. | 17.9 | 18.7 | 23.3 | Mg DETECTED. 23S rRNA mutations DETECTED. | 14.1 | 18.7 | 18.7 |
| clinical sample | 29   | M | 2018 | Urine         | DETECTED | Mg DETECTED. 23S rRNA mutations DETECTED. | 28.4 | 30.2 | 22.4 | Mg DETECTED. 23S rRNA mutations DETECTED. | 25.3 | 25.4 | 19.6 |
| clinical sample | 30   | M | 2018 | Urine         | DETECTED | Mg DETECTED. 23S rRNA mutations DETECTED. | 20.4 | 23.7 | 22.7 | Mg DETECTED. 23S rRNA mutations DETECTED. | 21.5 | 22.5 | 20.1 |
| clinical sample | 31   | M | 2018 | Urine         | DETECTED | Mg DETECTED. 23S rRNA mutations DETECTED. | 25.9 | 26.6 | 24.4 | Mg DETECTED. 23S rRNA mutations DETECTED. | 25.2 | 25.6 | 19.7 |
| clinical sample | 32   | M | 2018 | Urine         | DETECTED | Mg DETECTED. 23S rRNA mutations DETECTED. | 25.1 | 26.4 | 23.3 | Mg DETECTED. 23S rRNA mutations DETECTED. | 24.6 | 24.3 | 19.4 |
| clinical sample | 33   | M | 2018 | Urine         | DETECTED | Mg DETECTED. 23S rRNA mutations DETECTED. | 21.2 | 23.4 | 24.6 | Mg DETECTED. 23S rRNA mutations DETECTED. | 17.5 | 18.5 | 18.1 |
| clinical sample | 34   | M | 2018 | Urine         | DETECTED | Mg DETECTED. 23S rRNA mutations DETECTED. | 22.6 | 24.9 | 25.2 | Mg DETECTED. 23S rRNA mutations DETECTED. | 21   | 25.3 | 19   |
| clinical sample | 35   | M | 2018 | Urine         | DETECTED | Mg DETECTED. 23S rRNA mutations DETECTED. | 24.2 | 25.1 | 24.4 | Mg DETECTED. 23S rRNA mutations DETECTED. | 21   | 21.1 | 18.2 |
| clinical sample | 36   | M | 2018 | Urine         | DETECTED | Mg DETECTED. 23S rRNA mutations DETECTED. | 21.1 | 23.4 | 23.4 | Mg DETECTED. 23S rRNA mutations DETECTED. | 16.7 | 21.6 | 20.3 |
| clinical sample | 37   | M | 2018 | Urine         | DETECTED | Mg DETECTED. 23S rRNA mutations DETECTED. | 20.3 | 21.7 | 24.2 | Mg DETECTED. 23S rRNA mutations DETECTED. | 16.6 | 17.9 | 18.5 |
| clinical sample | 38   | M | 2018 | Urine         | DETECTED | Mg DETECTED. 23S rRNA mutations DETECTED. | 20.1 | 22.9 | 24.2 | Mg DETECTED. 23S rRNA mutations DETECTED. | 17.8 | 22.9 | 18.3 |
| clinical sample | 39   | M | 2018 | Urine         | DETECTED | Mg DETECTED. 23S rRNA mutations DETECTED. | 29.3 | 30.2 | 25.1 | Mg DETECTED. 23S rRNA mutations DETECTED. | 28.7 | 28.1 | 18.2 |
| clinical sample | 40   | M | 2018 | Urine         | DETECTED | Mg DETECTED. 23S rRNA mutations DETECTED. | 22.3 | 24.6 | 24.4 | Mg DETECTED. 23S rRNA mutations DETECTED. | 20.5 | 21.6 | 18.4 |
| clinical sample | 41 † | M | 2018 | Urine         | DETECTED | Mg DETECTED. 23S rRNA mutations DETECTED. | 20.3 | 21.8 | 22.2 | Mg DETECTED. 23S rRNA mutations DETECTED. | 18   | 18.9 | 19   |
| clinical sample | 42   | F | 2018 | Urine         | DETECTED | Mg DETECTED. 23S rRNA mutations DETECTED. | 20.7 | 24.3 | 23.6 | Mg DETECTED. 23S rRNA mutations DETECTED. | 17.3 | 21.1 | 18   |
| clinical sample | 43   | M | 2018 | Urethral Swab | DETECTED | Mg DETECTED. 23S rRNA mutations DETECTED. | 25.3 | 26.3 | 25.3 | Mg DETECTED. 23S rRNA mutations DETECTED. | 22.5 | 28.5 | 21.2 |

|                 |    |   |      |                       |          |                                                   |      |      |      |                                                   |      |      |      |
|-----------------|----|---|------|-----------------------|----------|---------------------------------------------------|------|------|------|---------------------------------------------------|------|------|------|
| clinical sample | 44 | F | 2018 | Cervical Swab         | DETECTED | Mg DETECTED. 23S rRNA mutations not detected.     | 24.5 | nd   | 24.1 | Mg DETECTED. 23S rRNA mutations not detected.     | 24.4 | nd   | 19.3 |
| clinical sample | 45 | F | 2018 | Urine                 | DETECTED | Mg DETECTED. 23S rRNA mutations not detected.     | 26.3 | nd   | 23.5 | Mg DETECTED. 23S rRNA mutations not detected.     | 25.8 | nd   | 19.3 |
| clinical sample | 46 | F | 2018 | Vaginal Swab          | DETECTED | Mg DETECTED. 23S rRNA mutations not detected.     | 39.9 | nd   | 23.3 | Mg DETECTED. 23S rRNA mutations not detected.     | 40.1 | nd   | 18.3 |
| clinical sample | 47 | F | 2018 | Vaginal Swab (400 µL) | DETECTED | Mg DETECTED. 23S rRNA mutations not detected.     | 35.1 | nd   | 22.8 | Mg DETECTED. 23S rRNA mutations not detected.     | 33.3 | nd   | 19.2 |
| clinical sample | 48 | M | 2018 | Rectal Swab (800 µL)  | DETECTED | Mg DETECTED. 23S rRNA mutations not detected.     | 36.9 | nd   | 23.3 | Mg DETECTED. 23S rRNA mutations not detected.     | 35.9 | nd   | 19.1 |
| clinical sample | 49 | M | 2017 | Urine                 | DETECTED | Mg DETECTED. 23S rRNA mutations not detected.     | 30.2 | nd   | 24.6 | Mg DETECTED. 23S rRNA mutations not detected.     | 27.4 | nd   | 21.6 |
| clinical sample | 50 | M | 2018 | Urine                 | DETECTED | Mg DETECTED. 23S rRNA mutations not detected.     | 19.5 | nd   | 24.1 | Mg DETECTED. 23S rRNA mutations not detected.     | 21.6 | 39.4 | 18.7 |
| clinical sample | 51 | M | 2018 | Urine                 | DETECTED | Mg DETECTED. 23S rRNA mutations not detected.     | 23.4 | nd   | 23.3 | Mg DETECTED. 23S rRNA mutations not detected.     | 21.1 | 35.7 | 20.2 |
| clinical sample | 52 | M | 2018 | Urine                 | DETECTED | Mg DETECTED. 23S rRNA mutations not detected.     | 35.6 | nd   | 22.4 | Mg DETECTED. 23S rRNA mutations not detected.     | 44.6 | 34   | 19.7 |
| clinical sample | 53 | M | 2017 | Urine                 | DETECTED | Mg DETECTED. 23S rRNA mutations not detected.     | 19.7 | 27.8 | 24.2 | Mg DETECTED. 23S rRNA mutations not detected.     | 15.8 | 26.3 | 17.4 |
| clinical sample | 54 | M | 2018 | Urine                 | DETECTED | Mg DETECTED. 23S rRNA mutations not detected.     | 23.4 | nd   | 23.3 | Mg DETECTED. 23S rRNA mutations not detected.     | 21.6 | 39.6 | 20.3 |
| clinical sample | 55 | M | 2018 | Urine                 | DETECTED | Mg DETECTED. 23S rRNA mutations not detected.     | 27.9 | nd   | 24.3 | Mg DETECTED. 23S rRNA mutations not detected.     | 25.9 | nd   | 20.8 |
| clinical sample | 56 | M | 2018 | Urine                 | DETECTED | Mg DETECTED. 23S rRNA mutations not detected.     | 20   | 34.3 | 24.5 | Mg DETECTED. 23S rRNA mutations not detected.     | 18.5 | 33.3 | 19.1 |
| clinical sample | 57 | M | 2018 | Urine                 | DETECTED | Mg DETECTED. 23S rRNA mutations not detected.     | 28.4 | nd   | 24.8 | Mg DETECTED. 23S rRNA mutations not detected.     | 26.5 | nd   | 19.5 |
| clinical sample | 58 | M | 2018 | Urine                 | DETECTED | Mg DETECTED. 23S rRNA mutations not detected.     | 19.6 | 35.4 | 25.2 | Mg DETECTED. 23S rRNA mutations not detected.     | 17.2 | 30.1 | 18.2 |
| clinical sample | 59 | M | 2018 | Urine                 | DETECTED | Mg DETECTED. 23S rRNA mutations not detected.     | 20.1 | 39.2 | 23.3 | Mg DETECTED. 23S rRNA mutations not detected.     | 16.4 | 26.6 | 17.6 |
| clinical sample | 60 | F | 2018 | Cervical Swab         | DETECTED | Mg DETECTED. 23S rRNA mutations not detected.     | 19.6 | 31.2 | 22.9 | Mg DETECTED. 23S rRNA mutations not detected.     | 16.4 | 27.6 | 16   |
| clinical sample | 61 | M | 2018 | Rectal Swab           | DETECTED | Mg DETECTED. 23S rRNA mutations not detected.     | 28.1 | 39.8 | 22   | Mg DETECTED. 23S rRNA mutations not detected.     | 25.5 | 35.1 | 17.7 |
| clinical sample | 62 | M | 2018 | Rectal Swab (550 µL)  | DETECTED | Mg DETECTED. 23S rRNA mutations not detected.     | 33   | nd   | 23.7 | Mg not detected. 23S rRNA mutations not detected. | nd   | nd   | 19.5 |
| clinical sample | 63 | M | 2018 | Urine                 | DETECTED | Mg DETECTED. 23S rRNA mutations not detected.     | 34.8 | nd   | 22.9 | Mg not detected. 23S rRNA mutations not detected. | nd   | nd   | 21.1 |
| clinical sample | 64 | F | 2018 | Urine                 | nd       | Mg not detected. 23S rRNA mutations not detected. | nd   | nd   | 23.8 | Mg not detected. 23S rRNA mutations not detected. | nd   | nd   | 17.9 |
| clinical sample | 65 | M | 2018 | Urine                 | nd       | Mg not detected. 23S rRNA mutations not detected. | nd   | nd   | 24.1 | Mg not detected. 23S rRNA mutations not detected. | nd   | nd   | 21.3 |
| clinical sample | 66 | F | 2018 | Cervical Swab         | nd       | Mg not detected. 23S rRNA mutations not detected. | nd   | nd   | 22.7 | Mg not detected. 23S rRNA mutations not detected. | nd   | nd   | 18.1 |

|                 |    |   |      |                        |    |                                                   |    |    |      |                                                   |    |    |      |
|-----------------|----|---|------|------------------------|----|---------------------------------------------------|----|----|------|---------------------------------------------------|----|----|------|
| clinical sample | 67 | F | 2018 | Cervical Swab          | nd | Mg not detected. 23S rRNA mutations not detected. | nd | nd | 24   | Mg not detected. 23S rRNA mutations not detected. | nd | nd | 17.3 |
| clinical sample | 68 | F | 2018 | Cervical Swab (550 µL) | nd | Mg not detected. 23S rRNA mutations not detected. | nd | nd | 25   | Mg not detected. 23S rRNA mutations not detected. | nd | nd | 22   |
| clinical sample | 69 | F | 2018 | Cervical Swab (700 µL) | nd | Mg not detected. 23S rRNA mutations not detected. | nd | nd | 25.1 | Mg not detected. 23S rRNA mutations not detected. | nd | nd | 19.2 |
| clinical sample | 70 | F | 2018 | Rectal Swab (550 µL)   | nd | Mg not detected. 23S rRNA mutations not detected. | nd | nd | 22.8 | Mg not detected. 23S rRNA mutations not detected. | nd | nd | 18.4 |
| clinical sample | 71 | F | 2018 | Rectal Swab (900 µL)   | nd | Mg not detected. 23S rRNA mutations not detected. | nd | nd | 22.8 | Mg not detected. 23S rRNA mutations not detected. | nd | nd | 20.4 |
| clinical sample | 72 | F | 2018 | Urine                  | nd | Mg not detected. 23S rRNA mutations not detected. | nd | nd | 24.4 | Mg not detected. 23S rRNA mutations not detected. | nd | nd | 18.1 |
| clinical sample | 73 | F | 2018 | Urine                  | nd | Mg not detected. 23S rRNA mutations not detected. | nd | nd | 24.8 | Mg not detected. 23S rRNA mutations not detected. | nd | nd | 20.2 |
| clinical sample | 74 | F | 2018 | Urine                  | nd | Mg not detected. 23S rRNA mutations not detected. | nd | nd | 24.4 | Mg not detected. 23S rRNA mutations not detected. | nd | nd | 22.3 |
| clinical sample | 75 | F | 2018 | Urine                  | nd | Mg not detected. 23S rRNA mutations not detected. | nd | nd | 23.8 | Mg not detected. 23S rRNA mutations not detected. | nd | nd | 20.6 |
| clinical sample | 76 | F | 2018 | Urine                  | nd | Mg not detected. 23S rRNA mutations not detected. | nd | nd | 24.5 | Mg not detected. 23S rRNA mutations not detected. | nd | nd | 17.4 |
| clinical sample | 77 | F | 2018 | Urine                  | nd | Mg not detected. 23S rRNA mutations not detected. | nd | nd | 23.8 | Mg not detected. 23S rRNA mutations not detected. | nd | nd | 19.8 |
| clinical sample | 78 | F | 2018 | Urine                  | nd | Mg not detected. 23S rRNA mutations not detected. | nd | nd | 23.7 | Mg not detected. 23S rRNA mutations not detected. | nd | nd | 19.8 |
| clinical sample | 79 | F | 2018 | Urine                  | nd | Mg not detected. 23S rRNA mutations not detected. | nd | nd | 25.3 | Mg not detected. 23S rRNA mutations not detected. | nd | nd | 17.8 |
| clinical sample | 80 | F | 2018 | Urine                  | nd | Mg not detected. 23S rRNA mutations not detected. | nd | nd | 23.3 | Mg not detected. 23S rRNA mutations not detected. | nd | nd | 20.9 |
| clinical sample | 81 | F | 2018 | Urine                  | nd | Mg not detected. 23S rRNA mutations not detected. | nd | nd | 23.1 | Mg not detected. 23S rRNA mutations not detected. | nd | nd | 18.5 |
| clinical sample | 82 | F | 2018 | Urine                  | nd | Mg not detected. 23S rRNA mutations not detected. | nd | nd | 22.8 | Mg not detected. 23S rRNA mutations not detected. | nd | nd | 19.2 |
| clinical sample | 83 | F | 2018 | Urine                  | nd | Mg not detected. 23S rRNA mutations not detected. | nd | nd | 24.8 | Mg not detected. 23S rRNA mutations not detected. | nd | nd | 20.9 |
| clinical sample | 84 | F | 2018 | Urine                  | nd | Mg not detected. 23S rRNA mutations not detected. | nd | nd | 24.1 | Mg not detected. 23S rRNA mutations not detected. | nd | nd | 19.1 |
| clinical sample | 85 | F | 2018 | Urine                  | nd | Mg not detected. 23S rRNA mutations not detected. | nd | nd | 22.3 | Mg not detected. 23S rRNA mutations not detected. | nd | nd | 20.2 |
| clinical sample | 86 | F | 2018 | Vaginal Swab (750 µL)  | nd | Mg not detected. 23S rRNA mutations not detected. | nd | nd | 23.3 | Mg not detected. 23S rRNA mutations not detected. | nd | nd | 17.4 |
| clinical sample | 87 | F | 2018 | Vaginal Swab (800 µL)  | nd | Mg not detected. 23S rRNA mutations not detected. | nd | nd | 23.3 | Mg not detected. 23S rRNA mutations not detected. | nd | nd | 20.4 |
| clinical sample | 88 | M | 2018 | Genital Swab           | nd | Mg not detected. 23S rRNA mutations not detected. | nd | nd | 23.8 | Mg not detected. 23S rRNA mutations not detected. | nd | nd | 21.3 |

|                 |     |   |      |                      |    |                                                   |    |    |      |                                                   |    |    |      |
|-----------------|-----|---|------|----------------------|----|---------------------------------------------------|----|----|------|---------------------------------------------------|----|----|------|
| clinical sample | 89  | M | 2018 | Rectal Swab          | nd | Mg not detected. 23S rRNA mutations not detected. | nd | nd | 22.1 | Mg not detected. 23S rRNA mutations not detected. | nd | nd | 21.3 |
| clinical sample | 90  | M | 2018 | Rectal Swab (500 µL) | nd | Mg not detected. 23S rRNA mutations not detected. | nd | nd | 23.4 | Mg not detected. 23S rRNA mutations not detected. | nd | nd | 18.4 |
| clinical sample | 91  | M | 2019 | Rectal Swab (500 µL) | nd | Mg not detected. 23S rRNA mutations not detected. | nd | nd | 24.1 | Mg not detected. 23S rRNA mutations not detected. | nd | nd | 20.1 |
| clinical sample | 92  | M | 2018 | Rectal Swab (600 µL) | nd | Mg not detected. 23S rRNA mutations not detected. | nd | nd | 24.4 | Mg not detected. 23S rRNA mutations not detected. | nd | nd | 18.2 |
| clinical sample | 93  | M | 2018 | Rectal Swab (650 µL) | nd | Mg not detected. 23S rRNA mutations not detected. | nd | nd | 25.3 | Mg not detected. 23S rRNA mutations not detected. | nd | nd | 20   |
| clinical sample | 94  | M | 2018 | Rectal Swab (800 µL) | nd | Mg not detected. 23S rRNA mutations not detected. | nd | nd | 22.9 | Mg not detected. 23S rRNA mutations not detected. | nd | nd | 17.6 |
| clinical sample | 95  | M | 2018 | Urine                | nd | Mg not detected. 23S rRNA mutations not detected. | nd | nd | 22.8 | Mg not detected. 23S rRNA mutations not detected. | nd | nd | 19.1 |
| clinical sample | 96  | M | 2018 | Urine                | nd | Mg not detected. 23S rRNA mutations not detected. | nd | nd | 23.3 | Mg not detected. 23S rRNA mutations not detected. | nd | nd | 18.5 |
| clinical sample | 97  | M | 2018 | Urine                | nd | Mg not detected. 23S rRNA mutations not detected. | nd | nd | 24.4 | Mg not detected. 23S rRNA mutations not detected. | nd | nd | 21.8 |
| clinical sample | 98  | M | 2018 | Urine                | nd | Mg not detected. 23S rRNA mutations not detected. | nd | nd | 23.1 | Mg not detected. 23S rRNA mutations not detected. | nd | nd | 21.3 |
| clinical sample | 99  | M | 2018 | Urine                | nd | Mg not detected. 23S rRNA mutations not detected. | nd | nd | 23.5 | Mg not detected. 23S rRNA mutations not detected. | nd | nd | 21.4 |
| clinical sample | 100 | M | 2018 | Urine                | nd | Mg not detected. 23S rRNA mutations not detected. | nd | nd | 23.5 | Mg not detected. 23S rRNA mutations not detected. | nd | nd | 18.1 |
| clinical sample | 101 | M | 2018 | Urine                | nd | Mg not detected. 23S rRNA mutations not detected. | nd | nd | 23.5 | Mg not detected. 23S rRNA mutations not detected. | nd | nd | 17.9 |
| clinical sample | 102 | M | 2018 | Urine                | nd | Mg not detected. 23S rRNA mutations not detected. | nd | nd | 24.6 | Mg not detected. 23S rRNA mutations not detected. | nd | nd | 19.5 |
| clinical sample | 103 | M | 2018 | Urine                | nd | Mg not detected. 23S rRNA mutations not detected. | nd | nd | 24.2 | Mg not detected. 23S rRNA mutations not detected. | nd | nd | 18.5 |
| clinical sample | 104 | M | 2018 | Urine                | nd | Mg not detected. 23S rRNA mutations not detected. | nd | nd | 23.3 | Mg not detected. 23S rRNA mutations not detected. | nd | nd | 21.4 |
| clinical sample | 105 | M | 2018 | Urine                | nd | Mg not detected. 23S rRNA mutations not detected. | nd | nd | 24.9 | Mg not detected. 23S rRNA mutations not detected. | nd | nd | 20.1 |
| clinical sample | 106 | M | 2018 | Urine                | nd | Mg not detected. 23S rRNA mutations not detected. | nd | nd | 23.4 | Mg not detected. 23S rRNA mutations not detected. | nd | nd | 19.3 |
| clinical sample | 107 | M | 2018 | Urine                | nd | Mg not detected. 23S rRNA mutations not detected. | nd | nd | 24.1 | Mg not detected. 23S rRNA mutations not detected. | nd | nd | 18.4 |
| clinical sample | 108 | M | 2018 | Urine                | nd | Mg not detected. 23S rRNA mutations not detected. | nd | nd | 23.7 | Mg not detected. 23S rRNA mutations not detected. | nd | nd | 18.9 |
| clinical sample | 109 | M | 2018 | Urine                | nd | Mg not detected. 23S rRNA mutations not detected. | nd | nd | 22.9 | Mg not detected. 23S rRNA mutations not detected. | nd | nd | 17.1 |
| clinical sample | 110 | M | 2018 | Urine                | nd | Mg not detected. 23S rRNA mutations not detected. | nd | nd | 23.3 | Mg not detected. 23S rRNA mutations not detected. | nd | nd | 19.4 |





|                 |                                 |   |      |             |               |                                                   |      |      |      |                                                   |                |                |                 |
|-----------------|---------------------------------|---|------|-------------|---------------|---------------------------------------------------|------|------|------|---------------------------------------------------|----------------|----------------|-----------------|
| clinical sample | 161                             | M | 2018 | Urine       | nd            | Mg not detected. 23S rRNA mutations not detected. | nd   | nd   | 23.4 | Mg not detected. 23S rRNA mutations not detected. | nd             | nd             | 22.7            |
| clinical sample | 162                             | M | 2018 | Urine       | nd            | Mg not detected. 23S rRNA mutations not detected. | nd   | nd   | 22.1 | Mg not detected. 23S rRNA mutations not detected. | nd             | nd             | 19.3            |
| clinical sample | 163                             | M | 2018 | Urine       | nd            | Mg not detected. 23S rRNA mutations not detected. | nd   | nd   | 24.3 | Mg not detected. 23S rRNA mutations not detected. | nd             | nd             | 21.8            |
| clinical sample | 164                             | M | 2018 | Urine       | nd            | Mg not detected. 23S rRNA mutations not detected. | nd   | nd   | 23.1 | Mg not detected. 23S rRNA mutations not detected. | nd             | nd             | 20.2            |
| clinical sample | 165                             | M | 2018 | Urine       | nd            | Mg not detected. 23S rRNA mutations not detected. | nd   | nd   | 25.4 | Mg not detected. 23S rRNA mutations not detected. | nd             | nd             | 22.6            |
| clinical sample | 166                             | M | 2018 | Urine       | nd            | Mg not detected. 23S rRNA mutations not detected. | nd   | nd   | 23.4 | Mg not detected. 23S rRNA mutations not detected. | nd             | nd             | 20.5            |
| clinical sample | 167                             | M | 2018 | Urine       | nd            | Mg not detected. 23S rRNA mutations not detected. | nd   | 32.2 | 22.7 | Mg not detected. 23S rRNA mutations not detected. | nd             | 24.9           | 22.4            |
| clinical sample | 168                             | M | 2018 | Urine       | nd            | Mg not detected. 23S rRNA mutations not detected. | nd   | nd   | 23.2 | Mg not detected. 23S rRNA mutations not detected. | nd             | nd             | 24.3            |
| clinical sample | 169                             | M | 2018 | Urine       | nd            | Mg not detected. 23S rRNA mutations not detected. | nd   | nd   | 24.2 | Mg not detected. 23S rRNA mutations not detected. | nd             | nd             | 19.8            |
| clinical sample | 170                             | M | 2018 | Urine       | nd            | Mg not detected. 23S rRNA mutations not detected. | nd   | nd   | 23.8 | Mg not detected. 23S rRNA mutations not detected. | nd             | nd             | 18.7            |
| clinical sample | 171                             | M | 2018 | Urine       | nd            | Mg not detected. 23S rRNA mutations not detected. | nd   | nd   | 24.6 | Mg not detected. 23S rRNA mutations not detected. | nd             | nd             | 18.4            |
| clinical sample | 172                             | M | 2018 | Urine       | nd            | Mg not detected. 23S rRNA mutations not detected. | nd   | nd   | 24.7 | Mg not detected. 23S rRNA mutations not detected. | nd             | nd             | 19.7            |
| clinical sample | 173                             | M | 2018 | Urine       | nd            | Mg not detected. 23S rRNA mutations not detected. | nd   | nd   | 24.3 | Mg not detected. 23S rRNA mutations not detected. | nd             | nd             | 18.1            |
| clinical sample | 174                             | M | 2018 | Urine       | nd            | Mg not detected. 23S rRNA mutations not detected. | nd   | nd   | 22.3 | Mg not detected. 23S rRNA mutations not detected. | nd             | nd             | 19.7            |
| clinical sample | 175                             | M | 2018 | Urine       | nd            | Mg not detected. 23S rRNA mutations not detected. | nd   | nd   | 25.1 | Mg not detected. 23S rRNA mutations not detected. | nd             | nd             | 19.4            |
| clinical sample | 176                             | M | 2018 | Urine       | nd            | Mg not detected. 23S rRNA mutations not detected. | nd   | nd   | 23.8 | Mg not detected. 23S rRNA mutations not detected. | nd             | nd             | 20.1            |
| clinical sample | 177                             | M | 2018 | Urine       | nd            | Mg not detected. 23S rRNA mutations not detected. | nd   | nd   | 22.8 | Mg not detected. 23S rRNA mutations not detected. | nd             | nd             | 22.1            |
| clinical sample | 178                             | M | 2018 | Urine       | nd            | Mg not detected. 23S rRNA mutations not detected. | nd   | nd   | 23.4 | Mg not detected. 23S rRNA mutations not detected. | nd             | nd             | 22.1            |
| clinical sample | 179                             | F | 2018 | Urine       | nd            | Mg not detected. 23S rRNA mutations not detected. | nd   | nd   | 23.2 | Mg not detected. 23S rRNA mutations not detected. | nd             | nd             | 19.2            |
| clinical sample | 180                             | M | 2018 | Rectal Swab | nd            | Mg not detected 23S rRNA mutations not detected.  | nd   | nd   | 23.4 | <b>Invalid</b>                                    | <b>Invalid</b> | <b>Invalid</b> | <b>Inva lid</b> |
| clinical sample | 181                             | M | 2018 | Urine       | nd            | Mg not detected. 23S rRNA mutations not detected. | nd   | nd   | 23.5 | <b>Invalid</b>                                    | <b>Invalid</b> | <b>Invalid</b> | <b>Inva lid</b> |
| dilution series | 10 <sup>-1</sup><br>replicate 1 | M | N/A  | Urine       | not performed | <b>Mg DETECTED. 23S rRNA mutations DETECTED.</b>  | 24.8 | 26.3 | 22.3 | <b>Mg DETECTED. 23S rRNA mutations DETECTED.</b>  | 22             | 22.3           | 18.1            |
| dilution series | 10 <sup>-1</sup><br>replicate 2 | M | N/A  | Urine       | not performed | <b>Mg DETECTED. 23S rRNA mutations DETECTED.</b>  | 24.4 | 26.2 | 22.3 | <b>Mg DETECTED. 23S rRNA mutations DETECTED.</b>  | 21.6           | 22             | 17.4            |
| dilution series | 10 <sup>-2</sup><br>replicate 1 | M | N/A  | Urine       | not performed | <b>Mg DETECTED. 23S rRNA mutations DETECTED.</b>  | 26.7 | 29.3 | 22.3 | <b>Mg DETECTED. 23S rRNA mutations DETECTED.</b>  | 25.5           | 24.6           | 18.4            |
| dilution series | 10 <sup>-2</sup><br>replicate 2 | M | N/A  | Urine       | not performed | <b>Mg DETECTED. 23S rRNA mutations DETECTED.</b>  | 30.3 | 29.3 | 22.3 | <b>Mg DETECTED. 23S rRNA mutations DETECTED.</b>  | 26.6           | 24.8           | 18.4            |



|                 |                                 |   |     |       |               |                                                  |      |      |      |                                                  |      |      |      |
|-----------------|---------------------------------|---|-----|-------|---------------|--------------------------------------------------|------|------|------|--------------------------------------------------|------|------|------|
| dilution series | 10 <sup>-3</sup><br>replicate 1 | M | N/A | Urine | not performed | Mg DETECTED. 23S rRNA mutations DETECTED.        | 30.3 | 31.4 | 22.3 | Mg DETECTED. 23S rRNA mutations DETECTED.        | 29.8 | 37.9 | 17.8 |
| dilution series | 10 <sup>-3</sup><br>replicate 2 | M | N/A | Urine | not performed | Mg not detected 23S rRNA mutations not detected. | nd   | nd   | 22.3 | Mg DETECTED. 23S rRNA mutations DETECTED.        | 29.4 | 28.6 | 18   |
| dilution series | 10 <sup>-4</sup><br>replicate 1 | M | N/A | Urine | not performed | Mg not detected 23S rRNA mutations not detected. | nd   | nd   | 22.4 | Mg not detected 23S rRNA mutations not detected. | nd   | nd   | 19   |
| dilution series | 10 <sup>-4</sup><br>replicate 2 | M | N/A | Urine | not performed | Mg not detected 23S rRNA mutations not detected. | nd   | nd   | 22.1 | Mg not detected 23S rRNA mutations not detected. | nd   | nd   | 20.1 |
| dilution series | 10 <sup>-5</sup><br>replicate 1 | M | N/A | Urine | not performed | Mg not detected 23S rRNA mutations not detected. | nd   | nd   | 22.3 | Mg not detected 23S rRNA mutations not detected. | nd   | nd   | 17.9 |
| dilution series | 10 <sup>-5</sup><br>replicate 2 | M | N/A | Urine | not performed | Mg not detected 23S rRNA mutations not detected. | nd   | nd   | 22.6 | Mg not detected 23S rRNA mutations not detected. | nd   | nd   | 17.9 |
| dilution series | 10 <sup>-6</sup><br>replicate 1 | M | N/A | Urine | not performed | Mg not detected 23S rRNA mutations not detected. | nd   | nd   | 22.3 | Mg not detected 23S rRNA mutations not detected. | nd   | nd   | 18.3 |
| dilution series | 10 <sup>-6</sup><br>replicate 2 | M | N/A | Urine | not performed | Mg not detected 23S rRNA mutations not detected. | nd   | nd   | 22.3 | Mg not detected 23S rRNA mutations not detected. | nd   | nd   | 17.3 |
| dilution series | 10 <sup>-7</sup><br>replicate 1 | M | N/A | Urine | not performed | Mg not detected 23S rRNA mutations not detected. | nd   | nd   | 22.3 | Mg not detected 23S rRNA mutations not detected. | nd   | nd   | 18   |
| dilution series | 10 <sup>-7</sup><br>replicate 2 | M | N/A | Urine | not performed | Mg not detected 23S rRNA mutations not detected. | nd   | nd   | 22   | Mg not detected 23S rRNA mutations not detected. | nd   | nd   | 18.2 |
| dilution series | 10 <sup>-8</sup><br>replicate 1 | M | N/A | Urine | not performed | Mg not detected 23S rRNA mutations not detected. | nd   | nd   | 22.3 | Mg not detected 23S rRNA mutations not detected. | nd   | nd   | 18.1 |
| dilution series | 10 <sup>-8</sup><br>replicate 2 | M | N/A | Urine | not performed | Mg not detected 23S rRNA mutations not detected. | nd   | nd   | 22.1 | Mg not detected 23S rRNA mutations not detected. | nd   | nd   | 17.5 |

† Sample 41 used for limit of detection (LOD) dilution series analysis.

\* Samples 62 and 63 yielded discrepant results. Discrepant results for sample 62 was likely due to a combination of low infectious load and a low starting volume of the original sample, resulting in the pathogen not being identified from the original specimen in the SpDx-RPMG-Flex assay. Similarly, for sample 63, discordant results were likely as a consequence of low infectious load (as indicated by the high Ct values in the SpDx-RPMG assay).

‡ 23S rRNA mutations determined by UgenTec FastFinder software (SpDx-RPMG assay) or by GeneXpert software (Cepheid). Some non-specific amplification from the 23S rRNA mutant assay may be seen in samples that contain high concentrations of *M. genitalium* wild type 23S rRNA.
